# Supplementary material for: PcDWF1, a pear brassinosteroid biosynthetic gene homologous to AtDWARF1, affected the vegetative and reproductive growth of plants
Source: PubMed Central journal article supplement (PMC7060609; doi:10.1186/s12870-020-2323-8), 2020-03-06
Supplement: 12870_2020_2323_MOESM1_ESM.pdf [file 12870_2020_2323_MOESM1_ESM.pdf]

## Additional files

### Additional file 1

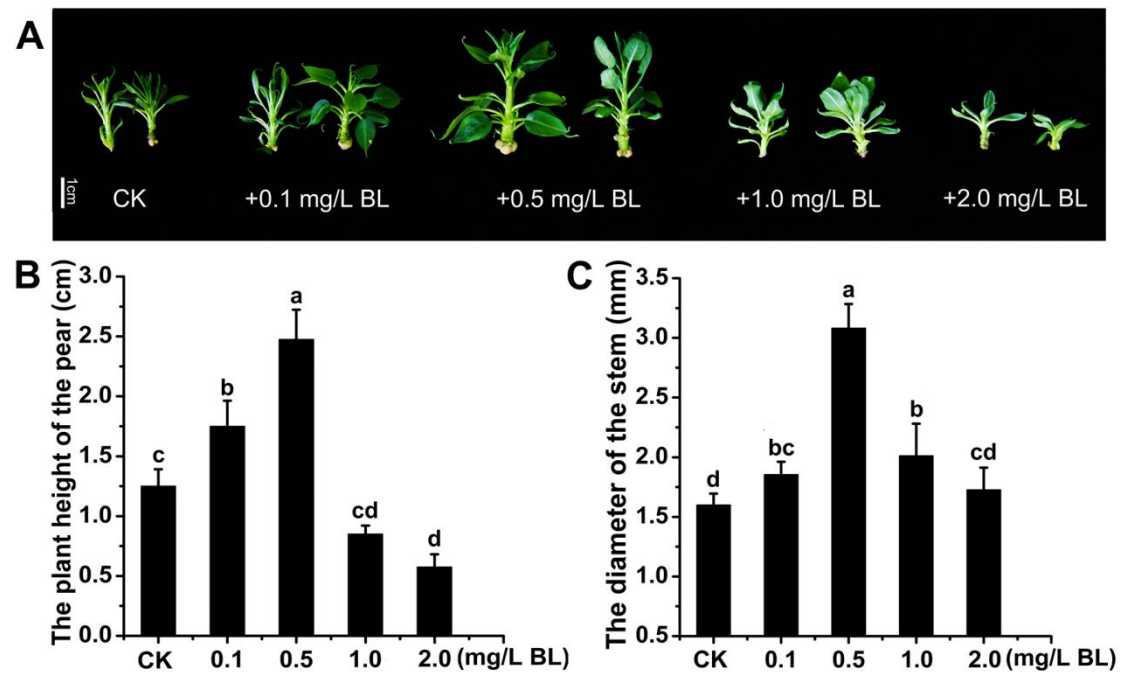

**Figure S1** The effect of different concentrations of BL on the growth of *Pyrus ussuriensis* plants. (A) The phenotypes of *Pyrus ussuriensis* with 0 mg/L, 0.1 mg/L, 0.5 mg/L, 1.0 mg/L, and 2.0 mg/L BL treatment on normal medium for 30 days, respectively. The plant height (B) and the diameter of the stem (C) of *Pyrus ussuriensis* with different concentrations of BL treatment. Data are the means  $\pm$  SD of triplicate experiments. Different lowercase letters indicate significant differences according to Fisher's LSD ( $P < 0.05$ ).

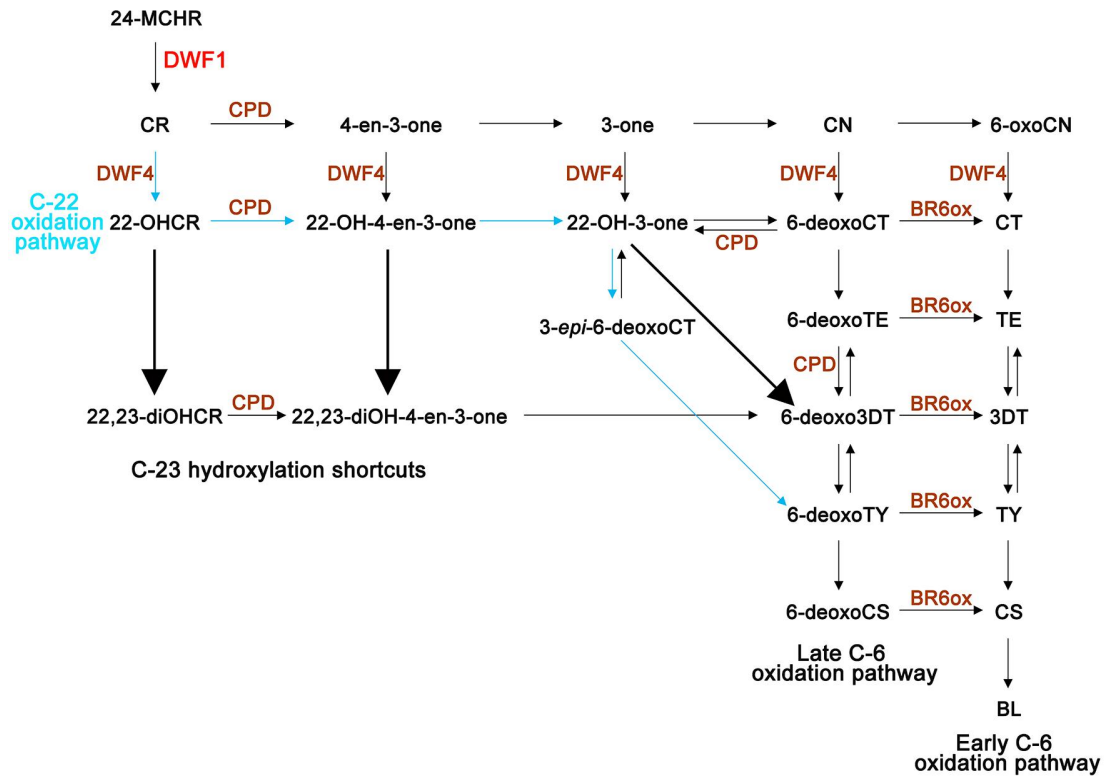

**Figure S2** Simplified brassinosteroid biosynthetic pathway with key rate-limiting enzymes (DWF1, CPD, DWF4, and BR6OX) involved in the reactions.

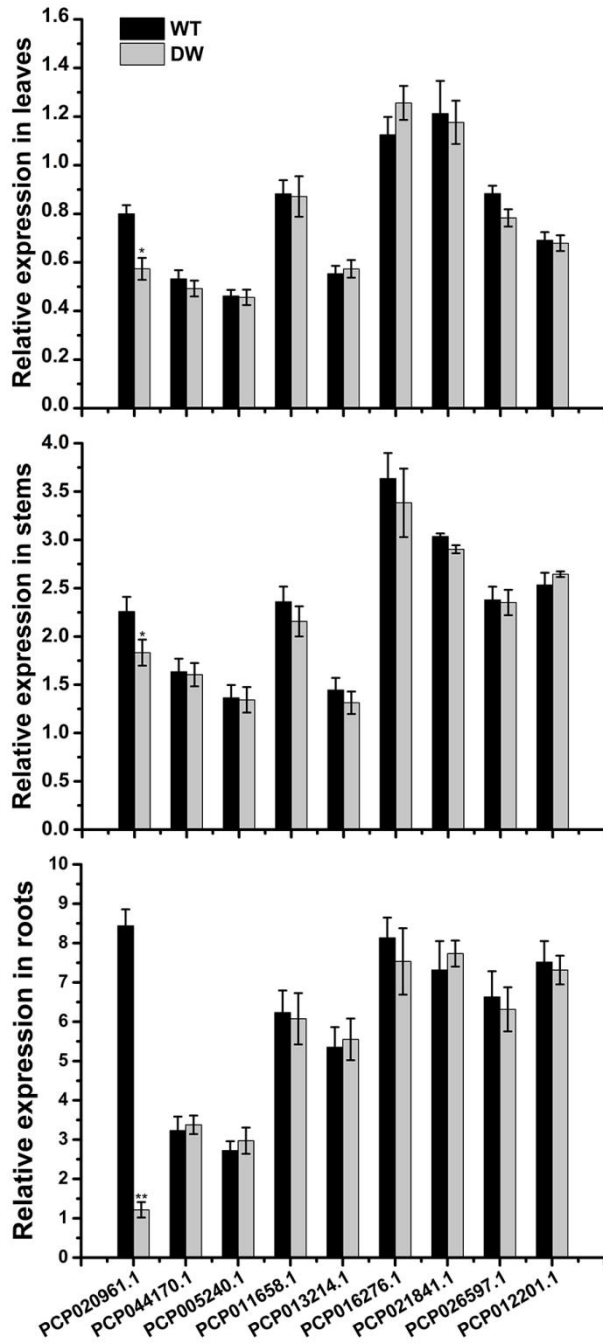

**Figure S3** Relative expression of BR biosynthetic rate-limiting genes (*PCP020961.1*, *PCP044170.1*, *PCP005240.1*, *PCP016276.1*, *PCP021841.1*, *PCP011658.1*, *PCP013214.1*, *PCP026597.1*, and *PCP012201.1*) in leaves, stems, roots of the dwarf-type and standard-type pears. Data are the means  $\pm$  SD of triplicate experiments. Asterisks (\*) indicate significant differences from the control (Student's *t*-test, \**P* < 0.05, \*\**P* < 0.01).

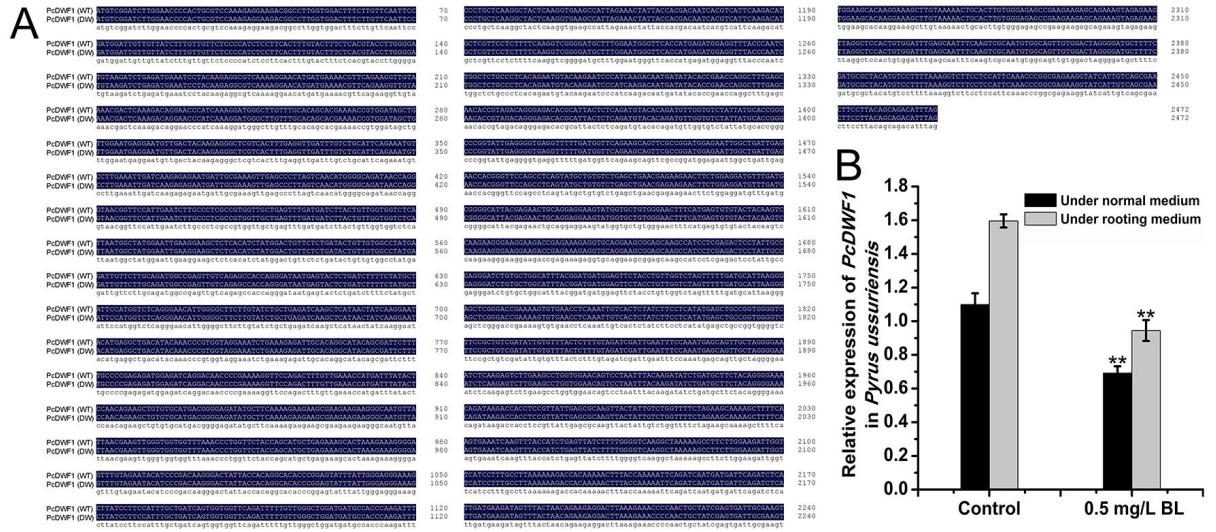

**Figure S4** The CDS sequence alignment of *PcDWF1* and the expression of *PcDWF1* under exogenous BL treatment. (A) The CDS sequence alignment of the *PcDWF1* between the dwarf-type and standard-type pears. (B) Relative expression of *PcDWF1* in *Pyrus ussuriensis* plants with/without exogenous 0.5 mg/L BL treatment. Data are the means  $\pm$  SD of triplicate experiments. Asterisks (\*) indicate significant differences from the control (Student's *t*-test,  $**P < 0.01$ ).

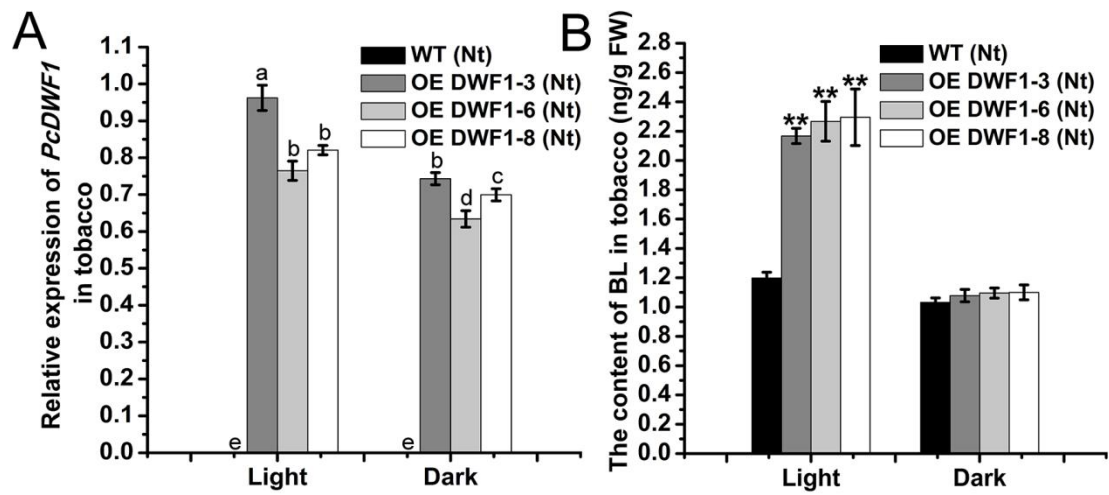

**Figure S5** Relative expression of *PcDWF1* (A) and the content of BL (B) in transgenic lines and wild type tobacco plants under continuous light/dark treatment. Data are the means  $\pm$  SD of triplicate experiments. Different lowercase letters indicate significant differences according to Fisher's LSD ( $P < 0.05$ ). Asterisks (\*) indicate significant differences from the control (Student's *t*-test,  $**P < 0.01$ ).

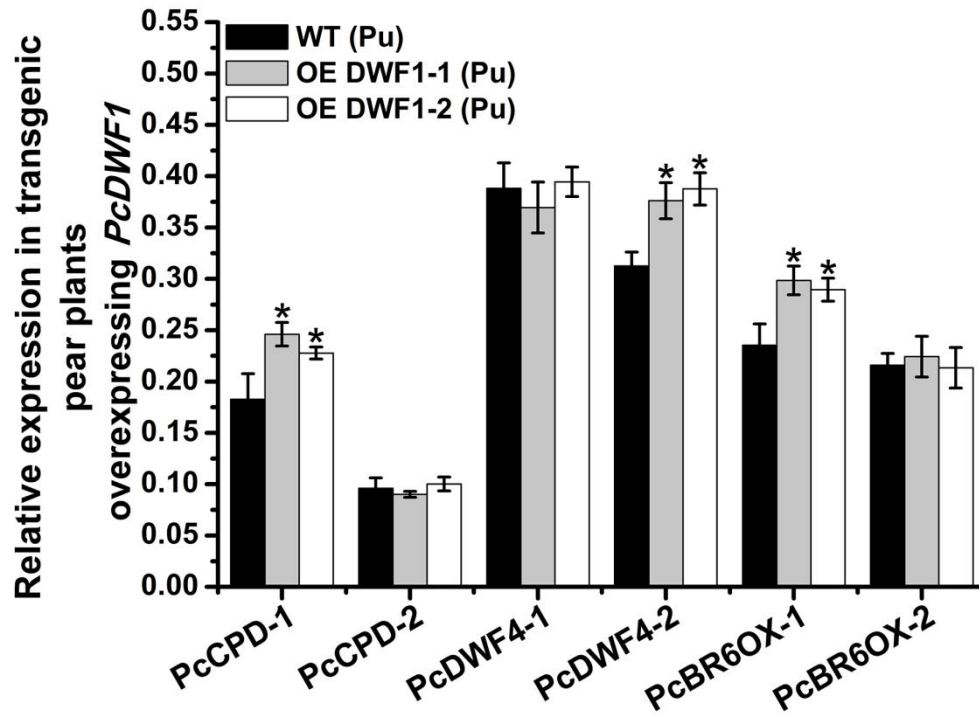

**Figure S6** Relative expression of *PcCPD-1*, *PcCPD-2*, *PcDWF4-1*, *PcDWF4-2*, *PcBR6OX1-1*, and *PcBR6OX1-2* in transgenic pear lines overexpressing *PcDWF1* and wild type pear plants. Data are the means  $\pm$  SD of triplicate experiments. Asterisks (\*) indicate significant differences from the control (Student's *t*-test,  $*P < 0.05$ ).

## Additional file 2

**Table S1** The primers used for cloning, vector construction and qRT-PCR

| Primer name                           | Forward primer                 | Reverse primer                | Vector |
|---------------------------------------|--------------------------------|-------------------------------|--------|
| Cloning the CDS of <i>PcDWF1</i>      | ATGTCGGATCTTGGAACC<br>CCACTGC  | CTAAATGTCTGCTGTAA<br>GGAAGT   |        |
| Cloning the promoter of <i>PcDWF1</i> | ACACTCTTATCCTCTTTTA<br>TCTAT   | CAAGATCCGACATCTTG<br>AAAGCA   |        |
| PcDWF1-GFP                            | TTAATTAAATGTCGGATC<br>TTGGAACC | GGCGCGCCAAATGTCTG<br>CTGTAAGG | pMDC83 |
| <i>Pro PcDWF1</i> -pMDC83             | AAGCTTACACTCTTATCC<br>TCTTTTA  | ACTAGTCTTGAAAGCAG<br>AACCCGTG | pMDC83 |
| PcDWF1-pBI121                         | GGATCCATGTCGGATCTT<br>GGAACCC  | CCCGGGAAATGTCTGCT<br>GTAAGG   | pBI121 |
| <i>PcActin</i> for qPCR               | TGGTGTCAATGGTTGGTAT<br>GG      | CAGGAGCAACACGAAG<br>TTCA      |        |
| <i>NtActin</i> for qPCR               | AGAGGCCCTCAGACAAA<br>C         | TAGGTCCAAAGGTCAC<br>AA        |        |
| <i>PcDWF1</i> for qPCR                | CAACACCGTAGACAGGG<br>AGACA     | CCGTAAATGCCAGCACA<br>GATC     |        |
| <i>PCP005240.1</i> for qPCR           | CGGAGTATTTATTGGGAG<br>GGAAAG   | ACCTTGAGTAGCCTTGA<br>GCAGA    |        |
| <i>PCP011658.1</i> for qPCR           | TCTCCGTTCCCTTGCCTC<br>TATT     | TCCCTCCTTTGCCTCAC<br>TATCA    |        |
| <i>PCP012201.1</i> for qPCR           | CCTAATGAATGAAGCCA<br>AAGGG     | GAATGTTGATAACTTGG<br>TTGTCCC  |        |
| <i>PCP013214.1</i> for qPCR           | CTCTAGTTTCCACCACCT<br>ACCGC    | CCAGAGGCTTTGACGA<br>CTTCTTT   |        |
| <i>PCP016276.1</i> for qPCR           | ATGGAGATGGCAGCAGA<br>ATAAC     | TGAGGACAAGGTGGTG<br>GATAAA    |        |
| <i>PCP021841.1</i> for qPCR           | AAGGATGTTCCGGTACAA<br>AGGGTA   | ATGGATTGAAGTGTGTA<br>GGGTG    |        |
| <i>PCP026597.1</i> for qPCR           | CTGGGACAACCAAGTCA<br>TCAAC     | GGTCTCATAACCCGAAT<br>ACAAAA   |        |
| <i>PCP044170.1</i> for qPCR           | TTTTCTATGCTATTCCGTG<br>GTCT    | CCTGTGGTAGTAGTCCC<br>TTGTCCG  |        |
